# Supplementary material
Source: publisher figshare collection journal article supplement (https://tandf.figshare.com/articles/dataset/_/24486424)
Supplement: Supplementary file 1 [file 1]

| Authors | Document Type | Map’s number | Map’s code | Map’s URL |
| --- | --- | --- | --- | --- |
| (Jaiswal & van Westen, 2013) | Article | Fig. 10E | Map1 | <https://link.springer.com/article/10.1007/s11069-012-0404-1/figures/10> |
| (Alcántara-Ayala et al., 2018) | Article | Fig. 3 | Map2 | <https://link.springer.com/article/10.1007/s10346-018-1010-4/figures/3> |
| Fig. 4 | Map3 | <https://link.springer.com/article/10.1007/s10346-018-1010-4/figures/4> |
| Fig. 5 | Map4 | <https://link.springer.com/article/10.1007/s10346-018-1010-4/figures/5> |
| Fig. 6 | Map5 | <https://link.springer.com/article/10.1007/s10346-018-1010-4/figures/6> |
| (Klimeš et al., 2019) | Article | ESM 3 | Map6 | <https://link.springer.com/article/10.1007/s10346-019-01203-w/figures/6> |
| (Ruiz-Cortés & Alcántara-Ayala, 2020) | Article | Fig. 5 | Map7 | <https://link.springer.com/article/10.1007/s10346-020-01391-w/figures/5> |
| (Karnawati, Fathani, Wilopo, & Maarif, 2018) | Book chapter | Fig. 6 | Map8 | <https://link.springer.com/chapter/10.1007/978-3-319-57777-7_38/figures/6> |
| (Karnawati, Fathani, Wilopo, & Andayani, 2018) | Book chapter | Fig. 2 | Map9 | <https://link.springer.com/chapter/10.1007/978-3-319-57777-7_36/figures/2> |
| (Setiawan et al., 2021) | Book chapter | Fig. 2 | Map10 | <https://link.springer.com/chapter/10.1007/978-3-030-60196-6_54/figures/2> |
| Fig. 4 | Map11 | [https://link.springer.com/chapter/10.1007/978-3-030-60196-6_54/figures/4](https://link.springer.com/chapter/10.1007/978-3-030-60196-6_54/figures/3) |
| Fig. 8 | Map12 | <https://link.springer.com/chapter/10.1007/978-3-030-60196-6_54/figures/8> |
| (Thanh et al., 2021) | Book chapter | Fig. 5 | Map13 | <https://link.springer.com/chapter/10.1007/978-3-030-60227-7_10/figures/5> |

Table 1. The list of document sources that meet the screening criteria.
